# Supplementary material for: Foliar Essential Oil Glands of Eucalyptus Subgenus Eucalyptus (Myrtaceae) Are a Rich Source of Flavonoids and Related Non-Volatile Constituents
Source: PLOS journal article supplement (doi:10.1371/journal.pone.0151432), 2016-03-15
Supplement: S1 (10.1371/journal.pone.0151432.s001) [file journal.pone.0151432.s001]

## Supporting Information

**S1 Figure. Representative mass spectra of putative flavanones and C-methyl flavanones detected in gland extracts of *E. meulleriana***

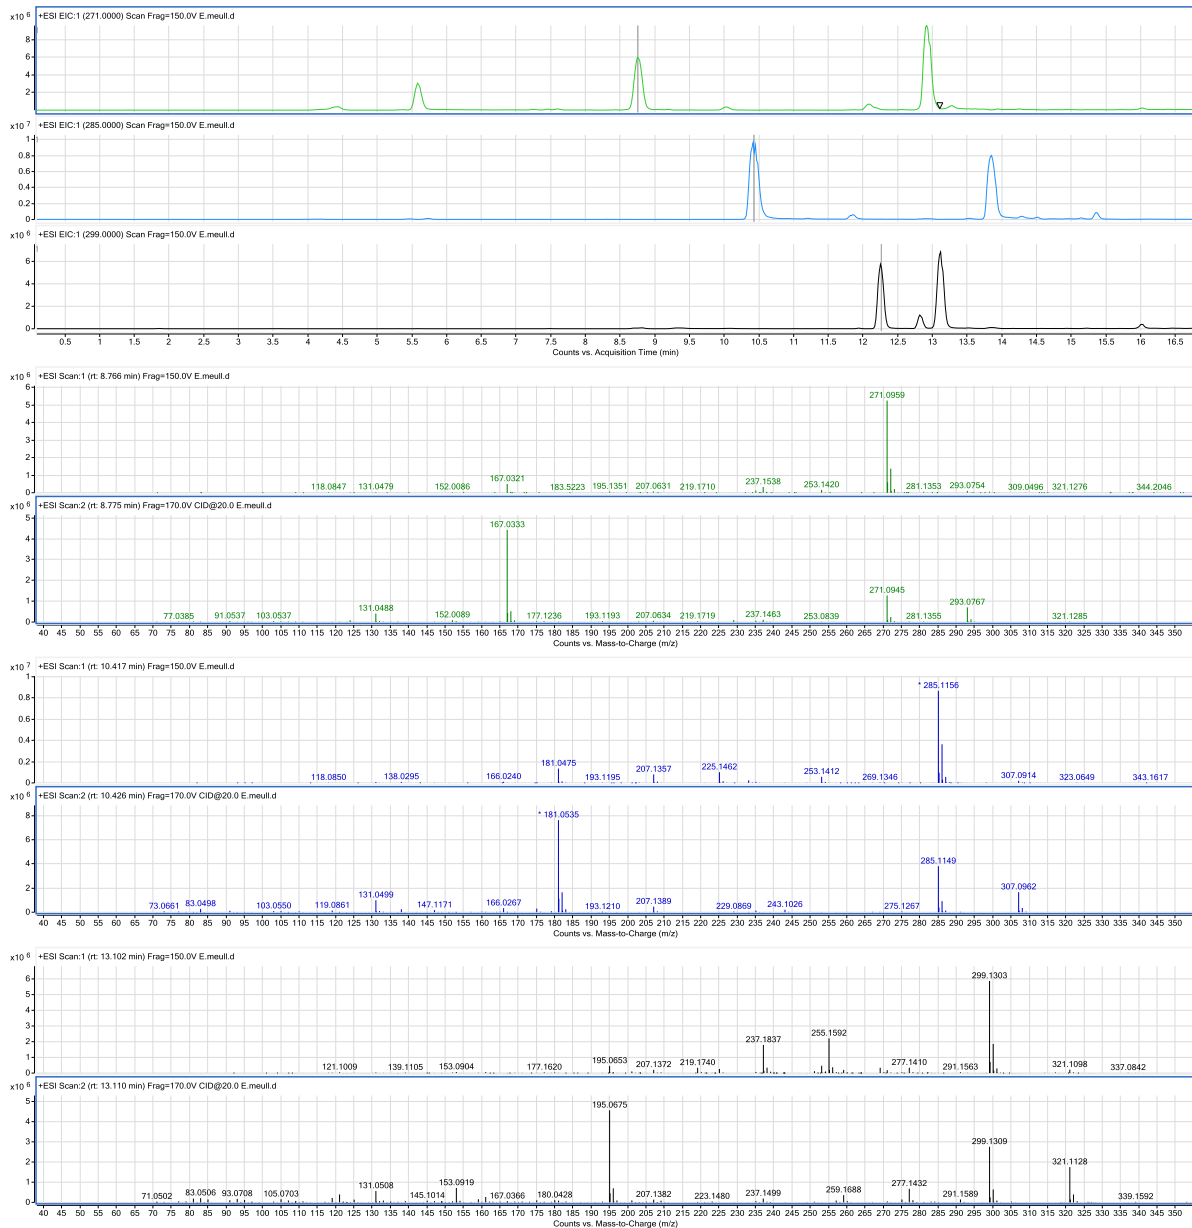

**S1 Fig. Multiple flavanones and C-methyl flavanones detected in gland extracts of *E. meulleriana* at  $m/z$   $[M+H]^+$  271, 285 and 299 using ESI-LCMS/MS in positive mode. All compounds show the characteristic loss of 104 Da of flavanones.**
