# Supplementary material for: Foliar Essential Oil Glands of Eucalyptus Subgenus Eucalyptus (Myrtaceae) Are a Rich Source of Flavonoids and Related Non-Volatile Constituents
Source: PLOS journal article supplement (doi:10.1371/journal.pone.0151432), 2016-03-15
Supplement: S2 (10.1371/journal.pone.0151432.s002) [file journal.pone.0151432.s002]

## Supporting Information

### S2 Figure. Representative mass spectra of a putative flavanone *O*-glucoside from *E. stellulata* glands

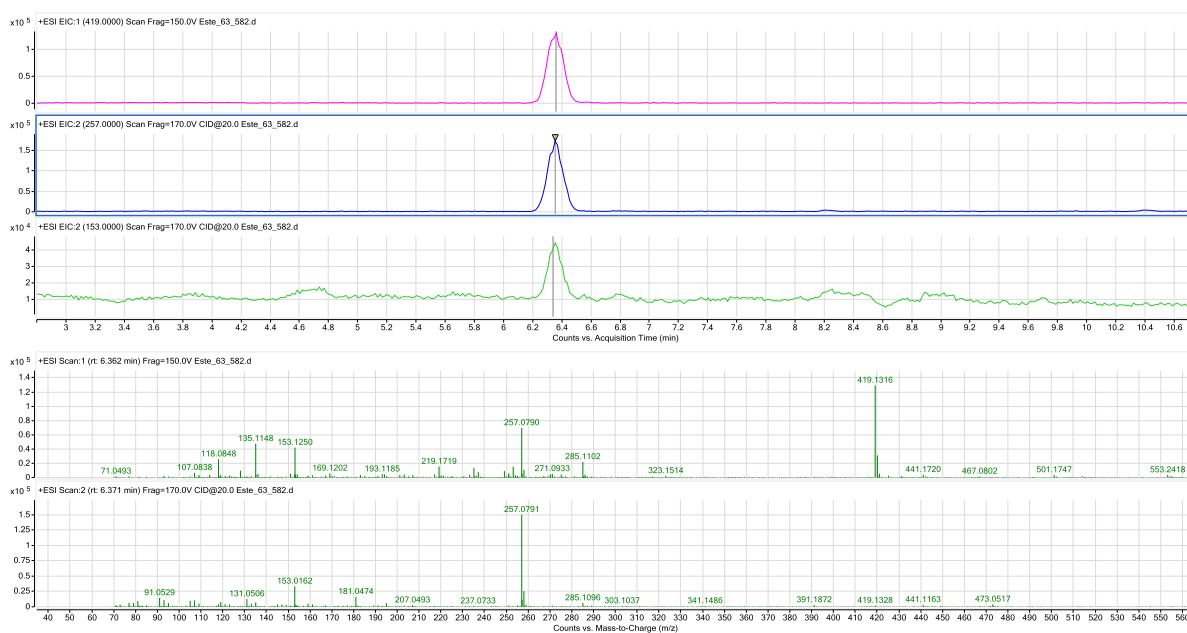

S2A Fig. A flavanone *O*-glucoside from *E. stellulata* glands observed with  $m/z$  419  $[M+H]^+$  using ESI-LCMS/MS in positive mode. Fragmentation results in the loss of glucose to yield the flavanone aglycone at  $m/z$  257  $[M+H]^+$ , which further fragments with a characteristic loss of 104 Da to  $m/z$  153.

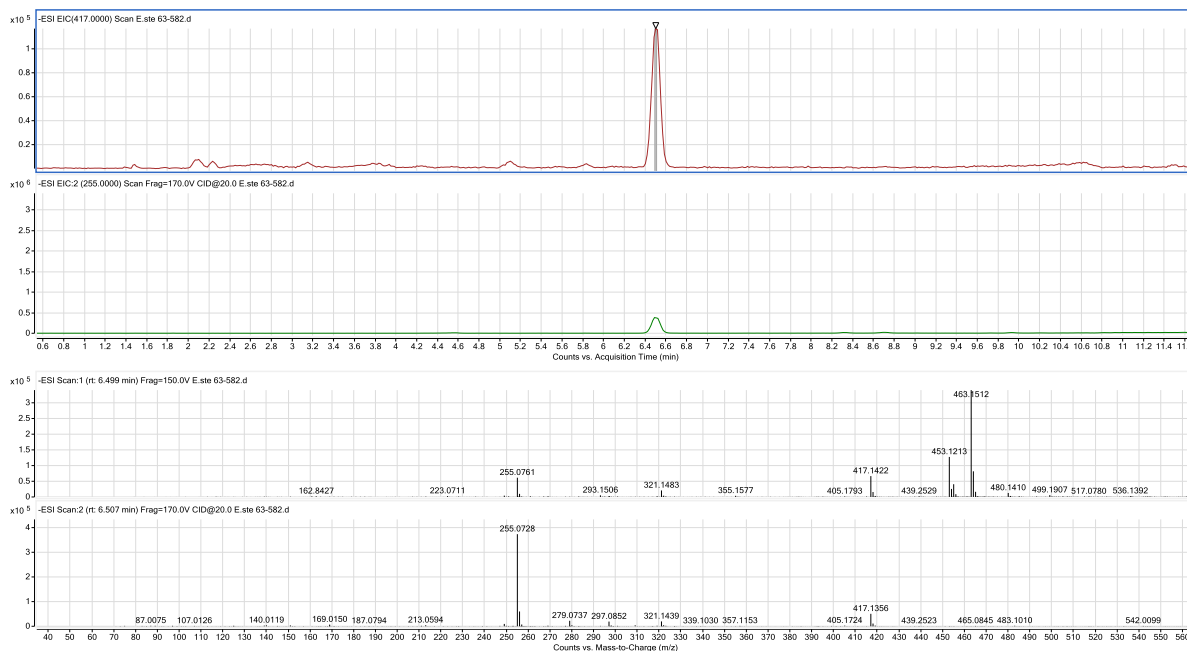

S2B Fig. The same flavanone *O*-glucoside from *E. stellulata* glands observed with  $m/z$  417  $[M-H]^-$  using negative mode. Fragmentation results in the loss of glucose (162 Da) yielding the flavanone aglycone with  $m/z$  255  $[M-H]^-$ .
